# Supplementary material
Source: PubMed Central journal article supplement (PMC516488)
Supplement: pnas_101_35_12876__4.pdf [file pnas_101_35_12876__4.pdf]

**Table 3. Summary of interaction energies in molecular models of 1,25D or CF in VDRwt and the receptor mutants S278A and Y143F/S278A**

| Ligand | Chair/<br>seco-B<br>ring<br>orientation | VDR<br>pocket | VDRwt<br>$I_E$ , kcal/mol | VDR<br>wt,<br>$\Delta I_E$ | VDR<br>S278A<br>$I_E$ ,<br>kcal/mol | VDR<br>S278<br>A,<br>$\Delta I_E$ | VDR Y143F/<br>S278A<br>$I_E$ , kcal/mol | VDR<br>Y143F/<br>S278A,<br>$\Delta I_E$ |
|--------|-----------------------------------------|---------------|---------------------------|----------------------------|-------------------------------------|-----------------------------------|-----------------------------------------|-----------------------------------------|
| 1,25D  | $\beta$ /trans                          | G             | -108                      | 17                         | -106                                | 17                                | -101                                    | 13                                      |
|        | $\beta$ /cis                            | A             | -93                       |                            | -89                                 |                                   | -87                                     |                                         |
|        | $\alpha$ /trans                         | A             | -88                       |                            | -88                                 |                                   | -89                                     |                                         |
| CF*    | $\beta$ /trans                          | G             | -98                       | 16                         | -99                                 | 18                                | -96                                     | 21                                      |
|        | $\beta$ /cis                            | A             | -85                       |                            | -81                                 |                                   | -73                                     |                                         |
|        | $\alpha$ /trans                         | A             | -76                       |                            | -83 <sup>†</sup>                    |                                   | -76                                     |                                         |

The  $I_{ES}$  and the  $\Delta I_{ES}$  were calculated as described in Table 1. Complexes where no A-ring H-bonds are formed with S237, R274, Y143, or S278 are indicated in italics.

\*CF has an  $\alpha/\beta$ -chair ratio of  $\approx 35:65$  in chloroform (based on known 1,25D and 25D A-ring chair equilibria) and therefore has been factored into the  $\Delta I_E$  value; see ¶, Table 1.

†In the VDR S278A mutant, the 1  $\alpha$ -OH of CF formed an H-bond with S237 in the  $\alpha$ /trans complex.
