# Supplementary material
Source: PubMed Central journal article supplement (PMC516488)

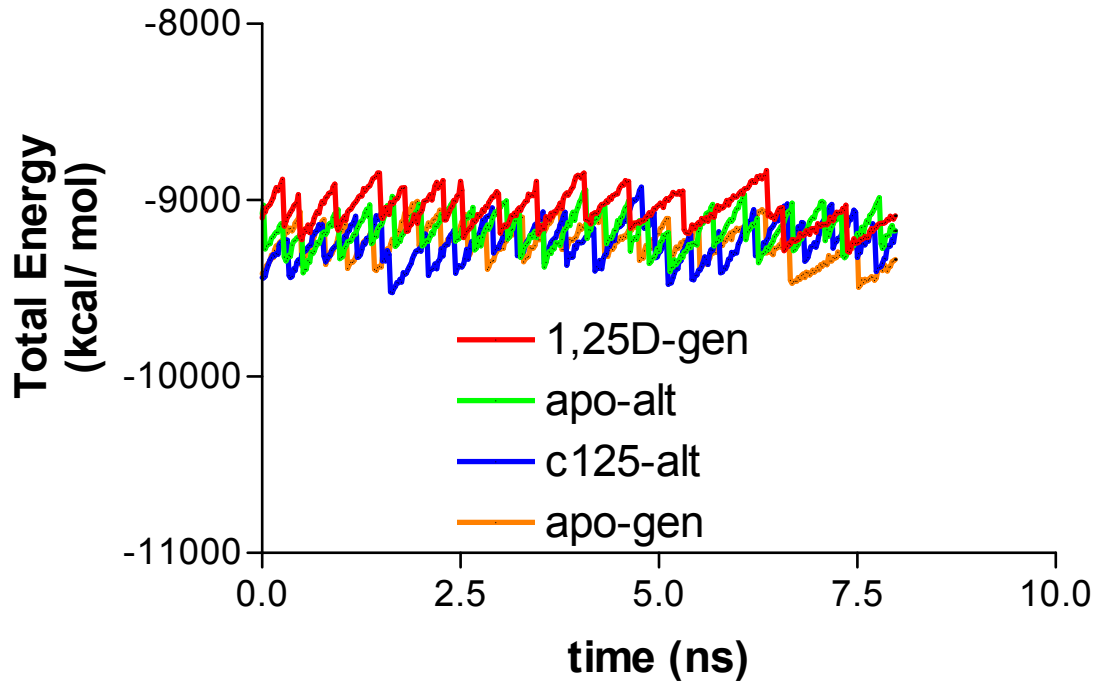

Supplement: pnas_101_35_12876__1.pdf [file pnas_101_35_12876__1.pdf]

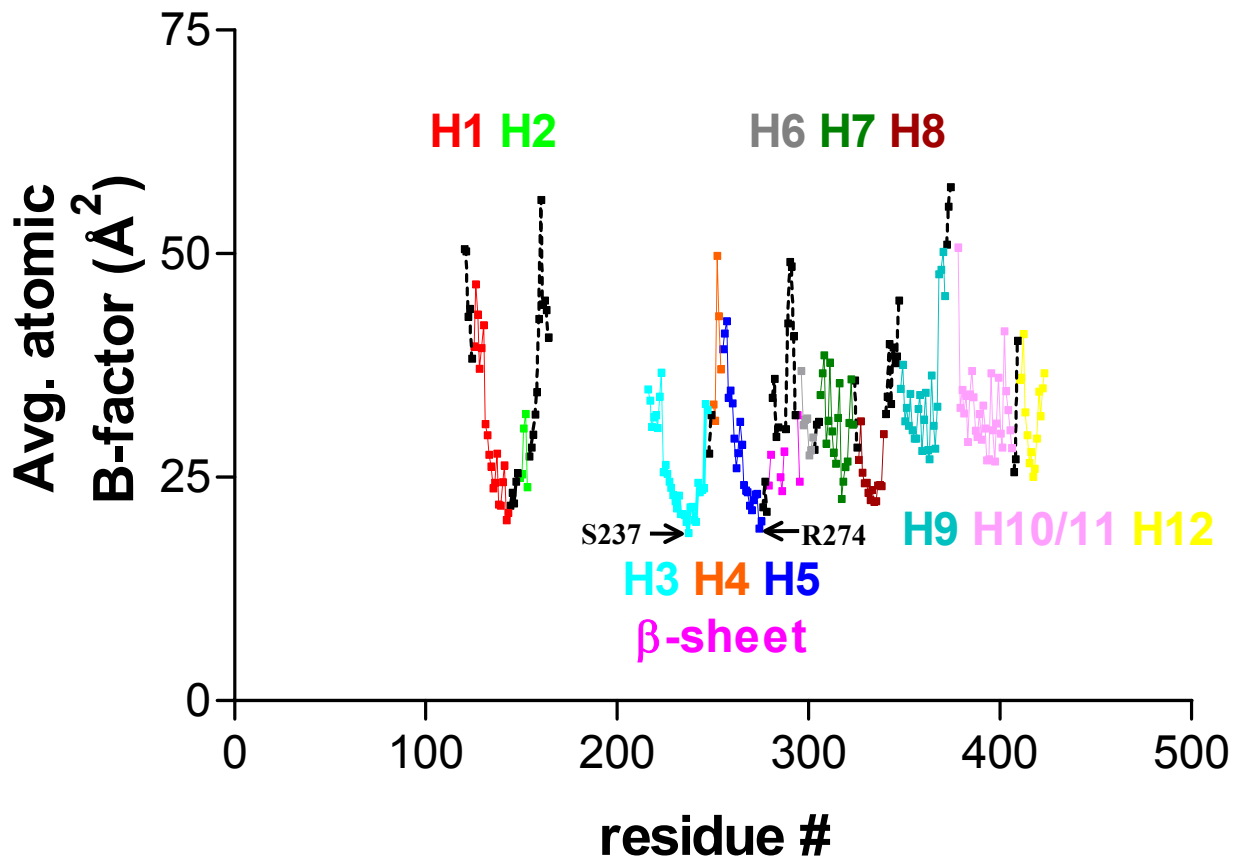

Supplement: pnas_101_35_12876__3.pdf [file pnas_101_35_12876__3.pdf]
